# Supplementary material
Source: HighWire-hosted journal article supplement (http://www.cmaj.ca/highwire/filestream/59202/field_highwire_adjunct_files/1/strep-cohen-10-at.pdf)
Supplement: strep-cohen-10-at.pdf [file strep-cohen-10-at.pdf]

## Appendix 10: Calibration plots of the external validation of clinical prediction rules

Each point corresponds to a risk level defined by the clinical prediction rule. Breese: A, score  $\leq 25$ ; B, score 26–31; C, score  $\geq 32$ . Mclsaac: A, score  $\leq 1$ ; B, score 2–3; C, score  $\geq 4$ . Wald: A, score  $\geq 1$ ; B, score 2–4; C, score  $\geq 5$ . Attia: A, score 0; B, score 1–3; C, score  $\geq 4$ . Joachim: A, score  $\leq 2$ ; B, score 3; C, score  $\geq 4$ . Predicted group A streptococcus (GAS) probabilities adjusted for prevalence. The diagonal line corresponds to perfect calibration.

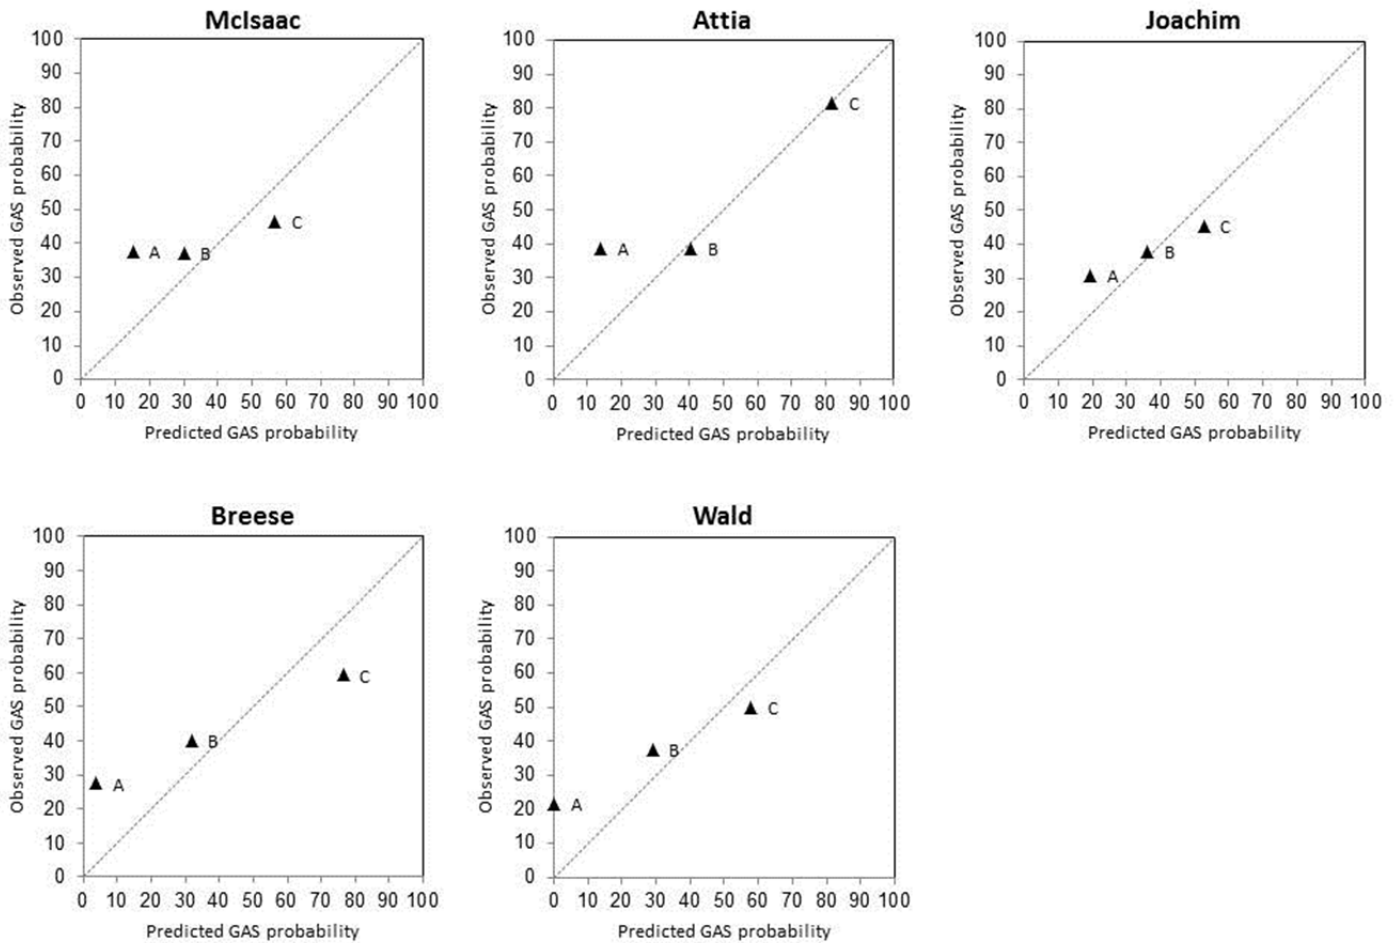

Appendix to: Cohen JF, Cohen R, Levy C, et al. Selective testing strategies for diagnosing group A streptococcal infection in children with pharyngitis: a systematic review and prospective multicentre external validation study. *CMAJ* 2014. DOI:10.1503/cmaj.140772.

Copyright © 2015 The Author(s) or their employer(s).

To receive this resource in an accessible format, please contact us at [cmajgroup@cmaj.ca](mailto:cmajgroup@cmaj.ca)
